# Supplementary material
Source: bioRxiv or medRxiv preprint supplement (https://medrxiv.org/highwire/filestream/70852/field_highwire_adjunct_files/1/2019.12.23.19014407-2.pdf)

Adjusted Rate of Decline

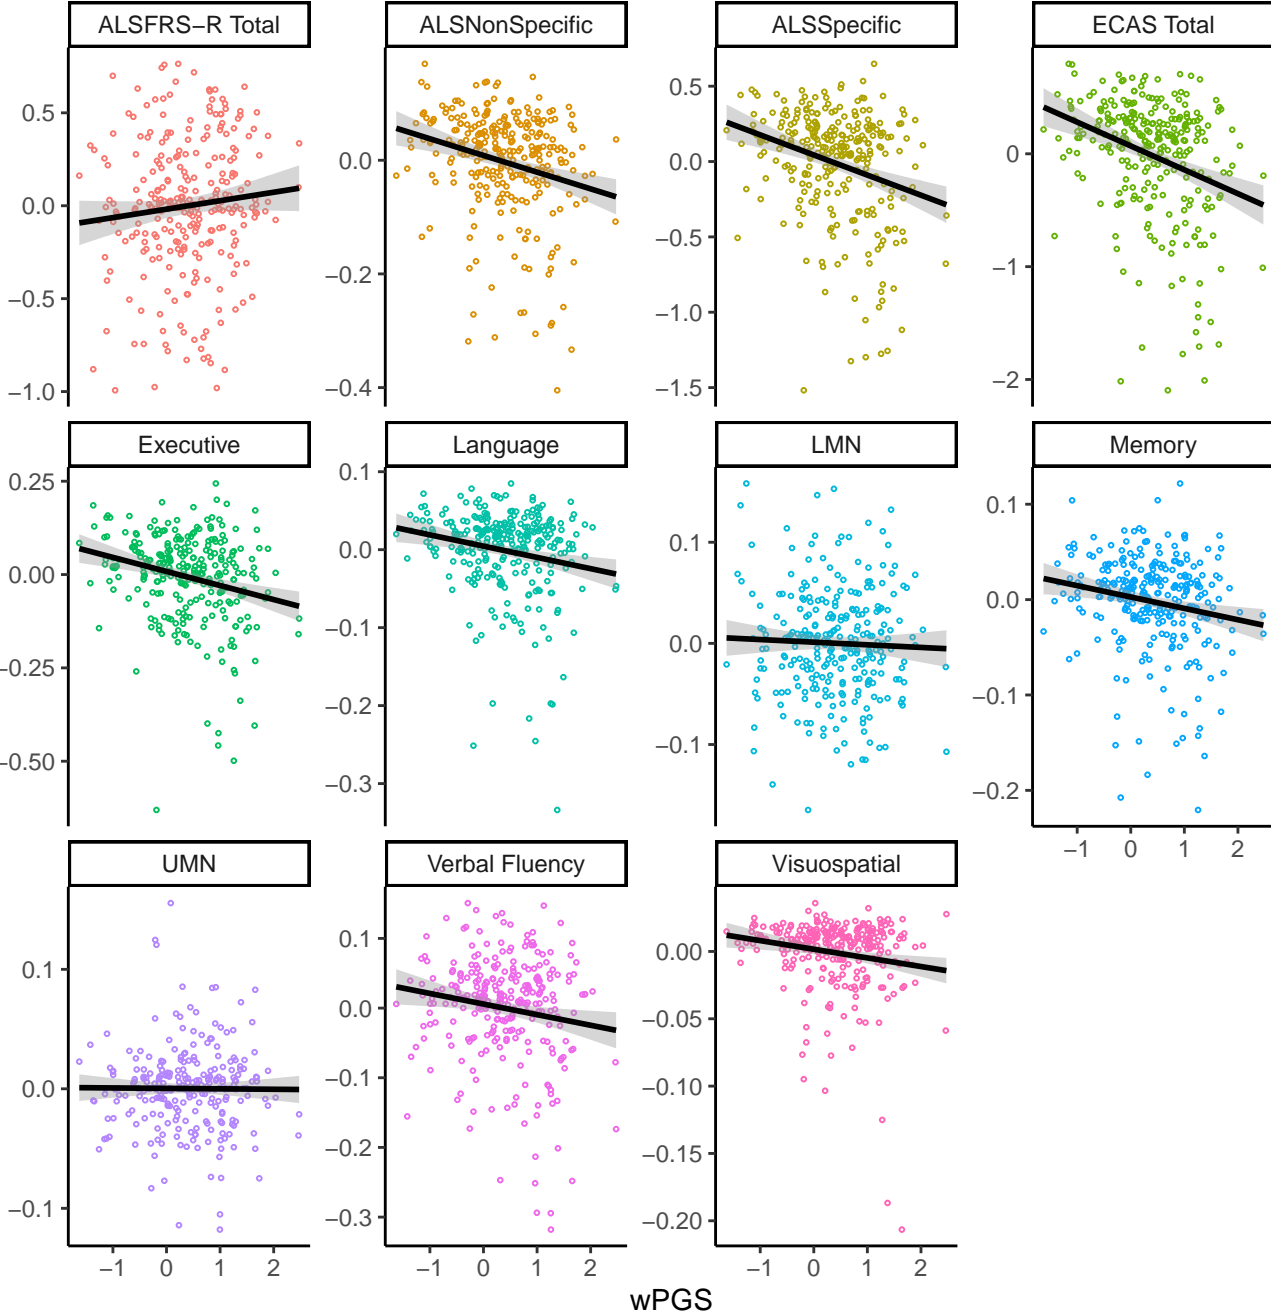

Supplement: Supplementary file [file 2019.12.23.19014407-2.pdf]
